# Supplementary material
Source: PubMed Central journal article supplement (PMC2993454)
Supplement: supp_110.035006_DMD35006_data_supplement.pdf [file supp_110.035006_DMD35006_data_supplement.pdf]

## DIVERSITY IN ANTIOXIDANT RESPONSE ENZYMES IN PROGRESSIVE STAGES OF HUMAN NON-ALCOHOLIC FATTY LIVER DISEASE

Rhiannon N. Hardwick, Craig D. Fisher, Mark J. Canet, April D. Lake, Nathan J. Cherrington

Department of Pharmacology and Toxicology, University of Arizona, Tucson AZ, USA

### Supplemental Data Table 1.

Human Oligonucleotide Probe Sets.

| Gene | Function | Probe Sequence                                 |
|------|----------|------------------------------------------------|
| NQO1 | CE       | cagatggccttctttataagccaTTTTTctcttgaaagaaagt    |
|      | CE       | gcggtccagcttctttgTTTTTctcttgaaagaaagt          |
|      | CE       | ccagccttcagaatggcagTTTTTctcttgaaagaaagt        |
|      | CE       | tggagtgtgcccaatgctatatTTTTTctcttgaaagaaagt     |
|      | LE       | aagttcgcagggtcctcagtTTTTTaggcataggaccctgtct    |
|      | LE       | gaacagactcggcaggatactgaTTTTTaggcataggaccctgtct |
|      | LE       | ttcagccacaatatctgggctTTTTTaggcataggaccctgtct   |
|      | LE       | ggactccaaaccactgcaggTTTTTaggcataggaccctgtct    |
|      | LE       | tctcctatgaacactcgctcaaaTTTTTaggcataggaccctgtct |
|      | LE       | acattcatgtcccgtggatTTTTTaggcataggaccctgtct     |
|      | LE       | ttgaattcgggctctgcTTTTTaggcataggaccctgtct       |
|      | LE       | gttcttccatcctccaggatTTTTTaggcataggaccctgtct    |
|      | LE       | tcatcccaaataattcaggcTTTTTaggcataggaccctgtct    |
|      | BL       | gggaactggaatatcacaaggct                        |
|      | BL       | ggcagcgtaagtgaagcaaac                          |
|      | BL       | cggaagggtccttgcatacat                          |
|      | BL       | tgaaagcactgccttcttact                          |

**DMD #35006**

|      |    |                                                      |
|------|----|------------------------------------------------------|
|      | BL | ccactgccaccagtgggta                                  |
|      | BL | cccttgagagagtacatggag                                |
|      | BL | cactctgaattggccagagaatg                              |
|      | BL | agccacagaaatgcagaatgc                                |
|      | BL | gtcagttgaggttctaagacttga                             |
| GCLC | CE | tctgcagcgagctccgtgTTTTTctcttgaaagaaagt               |
|      | CE | agttctccagatgctctcttctaaTTTTTctcttgaaagaaagt         |
|      | CE | ttactttcctaaatgctgatccaTTTTTctcttgaaagaaagt          |
|      | CE | gcattttcttctgtagaatgtctagttTTTTTctcttgaaagaaagt      |
|      | LE | caaccatccaccactgcattgTTTTTaggcataggaccctgtct         |
|      | LE | ctgttctgggccttgccaTTTTTaggcataggaccctgtct            |
|      | LE | tctatgctcatgagggtgtactccTTTTTaggcataggaccctgtct      |
|      | LE | tcctcccattgatgatgggTTTTTaggcataggaccctgtct           |
|      | LE | tgggtccacatccacttccatTTTTTaggcataggaccctgtct         |
|      | LE | ttagcttaggtagttcagaatactacatcTTTTTaggcataggaccctgtct |
|      | LE | catccatctggcaactgtcattTTTTTaggcataggaccctgtct        |
|      | LE | gatggttgcgataaactccctTTTTTaggcataggaccctgtct         |
|      | LE | catttgaatttgggtacacttcaTTTTTaggcataggaccctgtct       |
|      | LE | agtaactctgggcattcacataatTTTTTaggcataggaccctgtct      |
|      | LE | ggatgagtcagtttactccactataTTTTTaggcataggaccctgtct     |
|      | LE | ggtagctagccagttcgtcaataatTTTTTaggcataggaccctgtct     |
|      | LE | gggctggctgagaggcatTTTTTaggcataggaccctgtct            |
|      | BL | ggatcagtcaggaaacacacct                               |
|      | BL | gtttcaaggtaagagttcagaattg                            |
|      | BL | tatgacactgtcttgctttagtcag                            |

**DMD #35006**

|      |    |                                                    |
|------|----|----------------------------------------------------|
|      | BL | aaataaggctataattcatttcacagt                        |
| GCLM | CE | aagagcttcttgaaactgctTTTTTctcttgaaagaaagt           |
|      | CE | aaatgtagccttttgattgataattTTTTTctcttgaaagaaagt      |
|      | CE | caatttctctcatattgaaggaaattaTTTTTctcttgaaagaaagt    |
|      | LE | gaatgtaggaatgctttctgTTTTTtagcataggaccgtgtct        |
|      | LE | gcaccactcgtgcgctTTTTTtagcataggaccgtgtct            |
|      | LE | accgcagtagccacagcgTTTTTtagcataggaccgtgtct          |
|      | LE | cctctactttcacatgaccgaatTTTTTtagcataggaccgtgtct     |
|      | LE | caggcagtaactagattttacacatctTTTTTtagcataggaccgtgtct |
|      | LE | atctgcctcaatgacaccatttaTTTTTtagcataggaccgtgtct     |
|      | BL | aagaacccttcttttagcttga                             |
|      | BL | caggtaagttatgctcctaagtcagtt                        |

**Supplemental Data Table 2.**

Human qPCR Primers.

| Gene   | Accession Number | Primers                                                             | Probe |
|--------|------------------|---------------------------------------------------------------------|-------|
| GST A1 | NM 000463.2      | Forward: tatctccagcttccctctgc<br>Reverse: gcttcttctaaagatttctcatcca | 64    |
| GST A2 | NM 000846.3      | Forward: ttccagcttccctctgct<br>Reverse: tgattcttctaaagatttctcatcca  | 64    |
| GST A4 | NM 001512.3      | Forward: agttgtacaagttgcaggatgg                                     | 62    |

**DMD #35006**

Reverse: caattcaaccatgggcact

GST M1      NM 000561.2      Forward: gacttcatctcccgcttga      28

Reverse: ccagacagccatctga

GST M2      NM 000848.2      Forward: ggacttcatctcccgattg      28

Reverse: tctttgtgaacacaggtcttg

GST M3      NM 000849.4      Forward: gtgggataaaggcccagact      31

Reverse: gtcttagccttaactggaaatgc

GST M4      NM 000850.3      Forward: acttcatctcccgcttggag      28

Reverse: cccttggtacagaggttttg

GST P1      NM 000852.2      Forward: tcctcatctacaccaactatgag      56

Reverse: ggttcttgctccctggtt
